# Supplementary material for: Laboratory analysis of Au–Pd bimetallic nanoparticles synthesized with Citrus limon leaf extract and its efficacy on mosquito larvae and non-target organisms
Source: PubMed Central journal article supplement (PMC7728787; doi:10.1038/s41598-020-78662-y), 2020-12-10
Supplement: 41598_2020_78662_MOESM1_ESM.pdf [file 41598_2020_78662_MOESM1_ESM.pdf]

**Title: Laboratory Analysis of Au-Pd Bimetallic Nanoparticles Synthesized with *Citrus limon* leaf extract and its Efficacy on Mosquito larvae and Non-Target Organisms**

**Ref: Submission ID 451f4d21-c0f8-4023-9a7f-50b5ef26c74b**

**Savy Panamkuttiyel Minal<sup>1,\*</sup>, and Soam Prakash<sup>1</sup>**

<sup>1</sup>Advance Parasitology and Vector Control Nano-Biotechnology Laboratory, Department of Zoology, Dayalbagh Educational Institute (Deemed University), Agra, India - 282005

\*savypanamkuttiyelminal@gmail.com; soamprakash@dei.ac.in

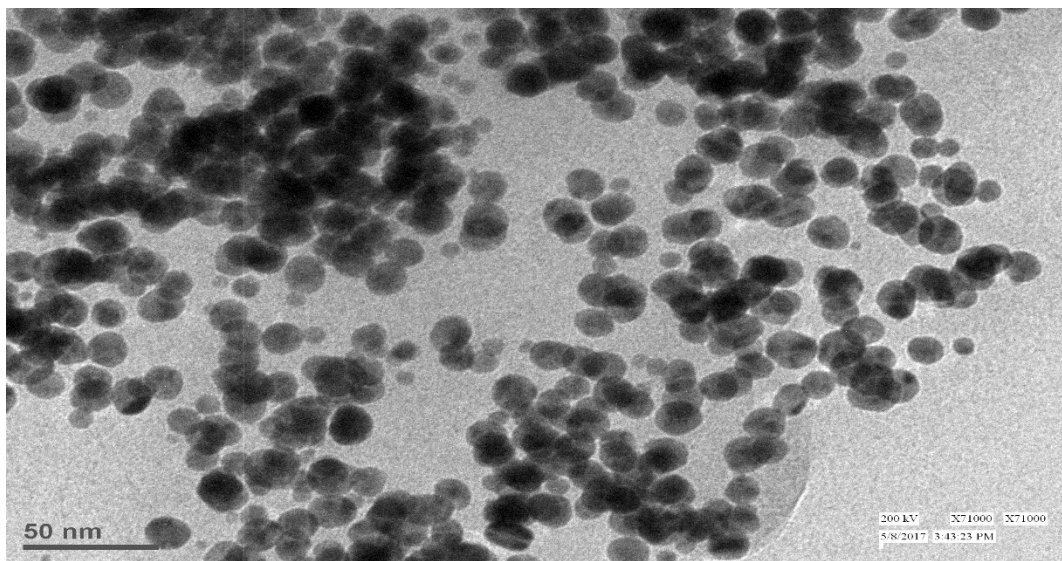

**Figure 2. i.** TEM micrograph of the undiluted sample of the synthesized Au-Pd BNPs

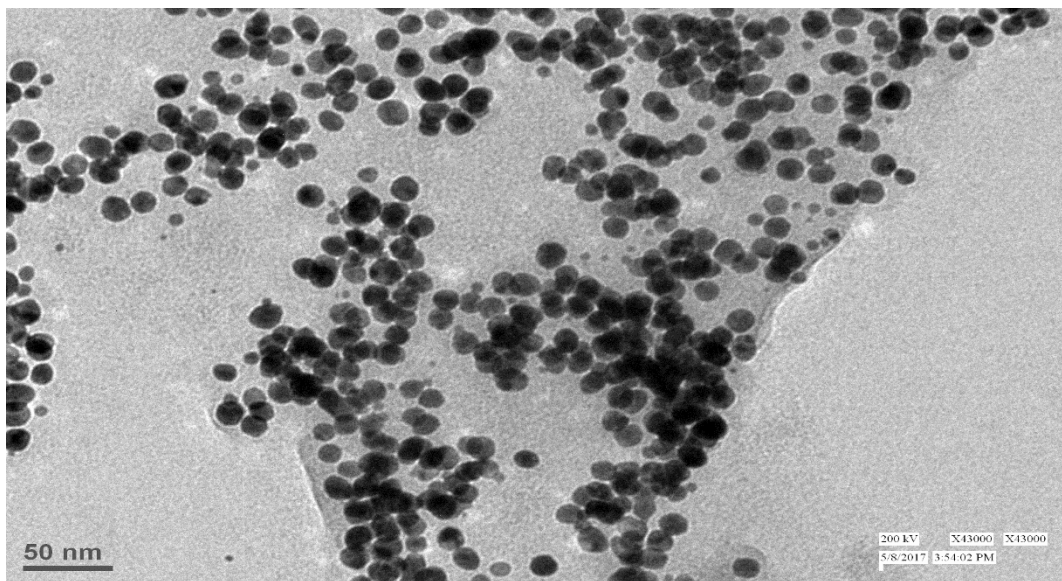

**Figure 2. ii.** TEM micrograph of the undiluted sample of the synthesized Au-Pd BNPs

| <b>A. Au-Pd BNPs Bioassay against <i>Anopheles stephensi</i></b> |      |                                                  |                |      |      |           |                            |                              |       |
|------------------------------------------------------------------|------|--------------------------------------------------|----------------|------|------|-----------|----------------------------|------------------------------|-------|
| Instar                                                           | Time | Probit equation<br>( $\hat{y}$ ) ( $\log_{10}$ ) | R <sup>2</sup> | SD   | SE   | $\chi^2$  | LC <sub>50</sub><br>(mL/L) | 95%<br>Fiducial CI<br>(mL/L) |       |
|                                                                  |      |                                                  |                |      |      |           |                            | Lower                        | Upper |
| I                                                                | 24   | $\hat{y} = 4.422x + 1.863$                       | 0.86           | 0.20 | 0.05 | 0.14 (NS) | 5.12                       | 4.15                         | 6.33  |
| II                                                               | 24   | $\hat{y} = 3.031x + 2.240$                       | 0.98           | 0.33 | 0.07 | 0.67 (NS) | 8.14                       | 5.94                         | 11.16 |
|                                                                  | 48   | $\hat{y} = 2.038x + 3.357$                       | 0.89           | 0.48 | 0.09 | 0.67 (NS) | 6.40                       | 4.23                         | 9.68  |
|                                                                  | 72   | $\hat{y} = 2.166x + 3.699$                       | 0.86           | 0.45 | 0.09 | 0.63 (NS) | 3.98                       | 2.695                        | 5.89  |
| III                                                              | 24   | $\hat{y} = 0.780x + 3.416$                       | 0.84           | 1.28 | 0.28 | -         | 26.32                      | 14.88                        | 46.55 |
|                                                                  | 48   | $\hat{y} = 3.580x + 0.980$                       | 0.89           | 0.25 | 0.07 | 0.01 (NS) | 13.27                      | 9.67                         | 18.21 |
|                                                                  | 72   | $\hat{y} = 2.823x + 2.447$                       | 0.81           | 0.34 | 0.07 | 0.17 (NS) | 8.02                       | 5.81                         | 11.08 |
| IV                                                               | 24   | $\hat{y} = 3.027x + 1.800$                       | 0.84           | 0.32 | 0.08 | 0.03 (S)  | 11.40                      | 8.06                         | 16.13 |
|                                                                  | 48   | $\hat{y} = 3.056x + 2.054$                       | 0.78           | 0.32 | 0.07 | 0.05 (NS) | 9.20                       | 6.68                         | 12.68 |
|                                                                  | 72   | $\hat{y} = 2.479x + 2.932$                       | 0.82           | 0.39 | 0.08 | 0.40 (NS) | 6.83                       | 4.80                         | 9.71  |
| <b>B. Au-Pd BNPs Bioassay against <i>Aedes aegypti</i></b>       |      |                                                  |                |      |      |           |                            |                              |       |
| I                                                                | 24   | $\hat{y} = 4.405x + 0.188$                       | 0.95           | 0.21 | 0.06 | 0.07 (NS) | 12.37                      | 9.33                         | 16.39 |
|                                                                  | 48   | $\hat{y} = 4.220x + 0.909$                       | 0.93           | 0.22 | 0.06 | 0.01 (S)  | 9.32                       | 7.24                         | 12.00 |
|                                                                  | 72   | $\hat{y} = 2.829x + 2.480$                       | 0.64           | 0.27 | 0.06 | 0.06 (NS) | 7.78                       | 5.91                         | 10.23 |
| II                                                               | 24   | $\hat{y} = 4.038x + 0.758$                       | 0.97           | 0.24 | 0.06 | 0.14 (NS) | 11.24                      | 8.45                         | 14.94 |
|                                                                  | 48   | $\hat{y} = 4.746x + 0.552$                       | 0.94           | 0.20 | 0.05 | 0.02 (S)  | 8.65                       | 6.87                         | 10.90 |
|                                                                  | 72   | $\hat{y} = 6.628x - 0.577$                       | 0.98           | 0.15 | 0.04 | 0.10 (NS) | 6.94                       | 5.79                         | 8.33  |
| III                                                              | 24   | $\hat{y} = 3.449x + 2.274$                       | 0.95           | 0.28 | 0.06 | 0.90 (NS) | 6.17                       | 4.71                         | 8.09  |
|                                                                  | 48   | $\hat{y} = 3.123x + 2.857$                       | 0.96           | 0.31 | 0.06 | 0.97 (NS) | 4.86                       | 3.63                         | 6.49  |
|                                                                  | 72   | $\hat{y} = 4.538x + 2.388$                       | 0.99           | 0.22 | 0.05 | 0.99 (NS) | 3.76                       | 2.99                         | 4.74  |
| IV                                                               | 24   | $\hat{y} = 2.083x + 2.846$                       | 0.93           | 0.47 | 0.10 | 0.82 (NS) | 10.83                      | 6.99                         | 16.76 |
|                                                                  | 48   | $\hat{y} = 2.341x + 2.880$                       | 0.96           | 0.42 | 0.08 | 0.87 (NS) | 8.05                       | 5.49                         | 11.80 |
|                                                                  | 72   | $\hat{y} = 2.695x + 2.841$                       | 0.96           | 0.37 | 0.07 | 0.84 (NS) | 6.32                       | 4.53                         | 8.82  |

**Table 1.** Statistical analysis of the percent mortality data for the calculation of the LC<sub>50</sub> at 24 h, 48 h, and 72 h of exposure of Au-Pd BNPs test concentration in the bioassay against I-IV instar larval stages of, A) *Anopheles stephensi* mosquito, and B) *Aedes aegypti* mosquito
